# Supplementary material for: Structural, luminescence and EPR studies on SrSnO3 nanorods doped with europium ions
Source: Royal Society of Chemistry journal article supplement (doi:10.1039/c2dt30691c), 2012-01-01
Supplement: c2dt30691c.pdf [file c2dt30691c.pdf]

## Supplementary Materials

### Structural, EPR and luminescence studies on SrSnO<sub>3</sub> nanorods doped with europium ions

D. K. Patel<sup>1</sup>, B. Rajeswari<sup>2</sup>, V. Sudarsan<sup>1</sup>, R. K. Vatsa<sup>1</sup>, R. M. Kadam<sup>2</sup> and  
S. K. Kulshreshtha<sup>\*3</sup>

<sup>1</sup>Chemistry Division, <sup>2</sup>Radio Chemistry Division, <sup>3</sup>Knowledge Management Group,  
Bhabha Atomic Research Centre, Trombay, Mumbai 400085, India

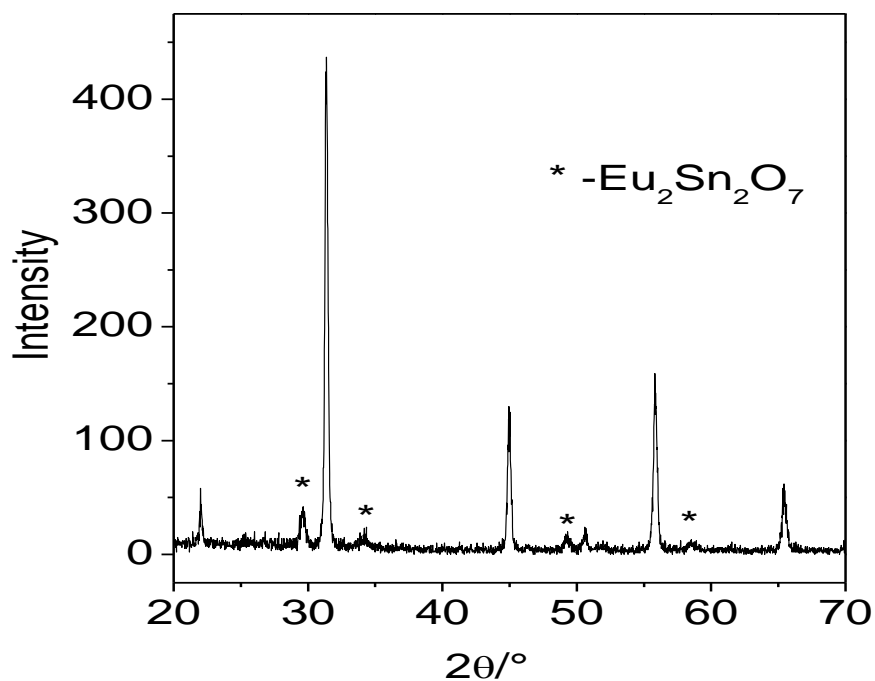

Figure 1. XRD patterns of SrSnO<sub>3</sub> nanorods containing 4 at % Eu<sup>3+</sup> ions. Peaks marked \* correspond to Eu<sub>2</sub>Sn<sub>2</sub>O<sub>7</sub> phase

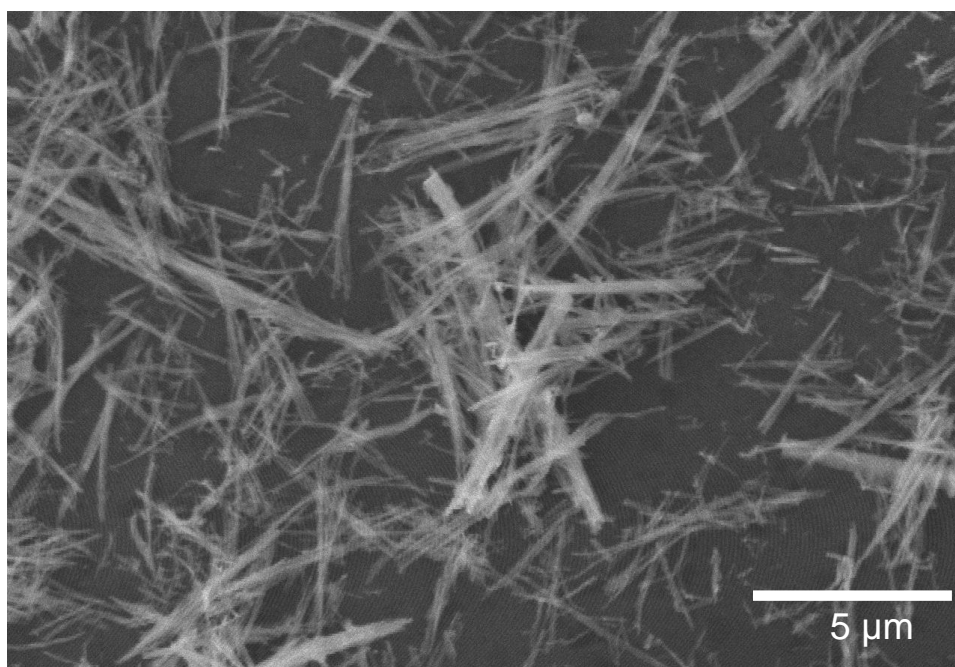

(a)

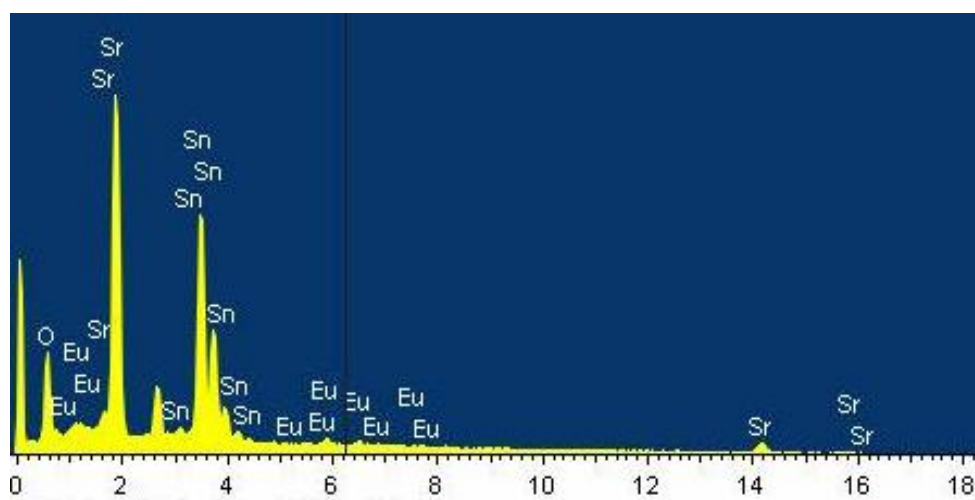

(b)

Figure 2. SEM image (a) and EDX pattern (b) of SrSnO<sub>3</sub>:Eu(3%) sample

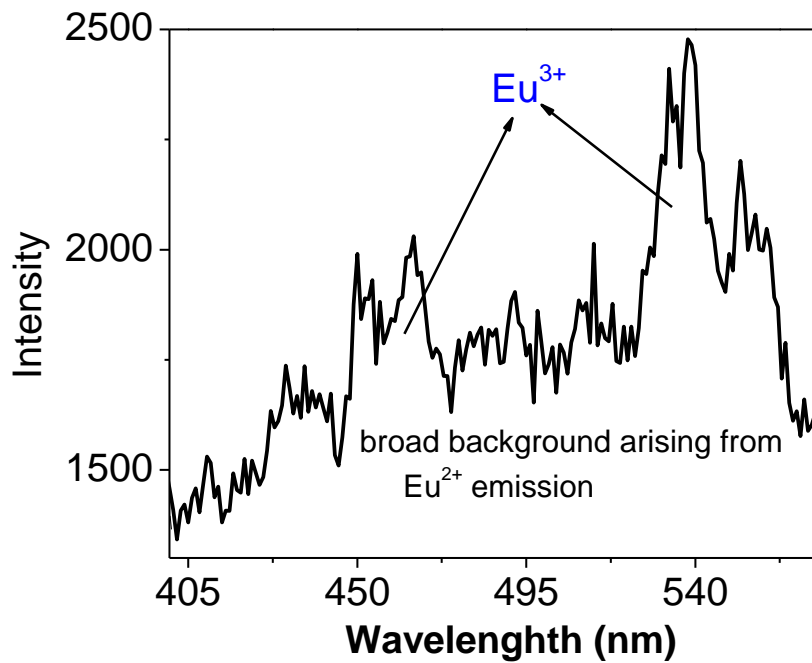

Figure 3. Emission spectrum from SrSnO<sub>3</sub>:Eu(1%) nanorods obtained after 305 nm excitation
